# Supplementary figures and images for: Discrimination of sepsis stage metabolic profiles with an LC/MS-MS-based metabolomics approach
Source: HighWire-hosted journal article supplement (doi:10.1136/bmjresp-2014-000056), 2014-12-01

**Supplemental Figure 1.** Trial profile for patients involved in this study.

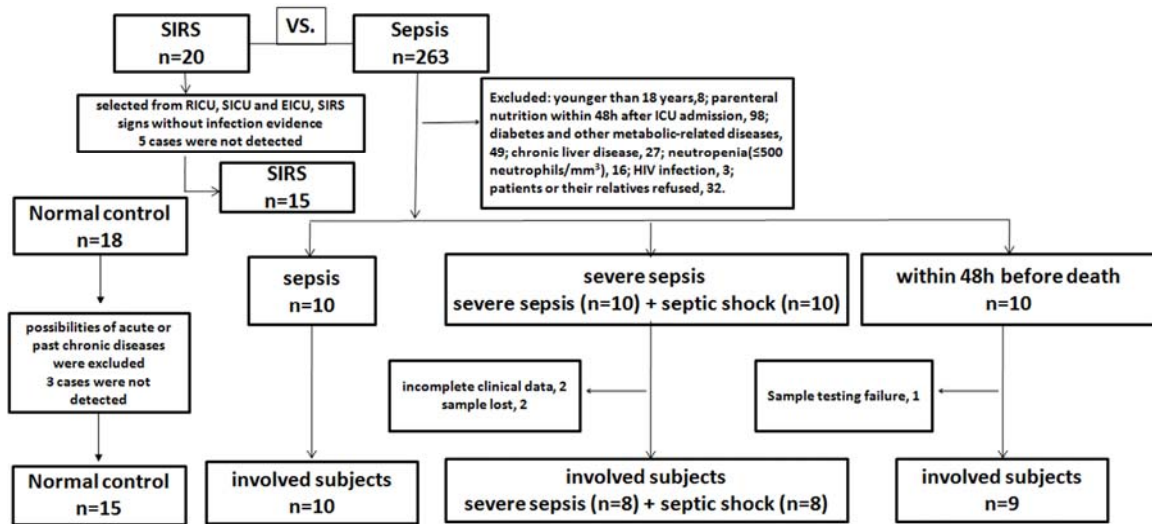

Supplement: bmjresp-2014-000056supp_figure.pdf [file bmjresp-2014-000056supp_figure.pdf]
